# Supplementary material
Source: MDPI journal article supplement (https://www.mdpi.com/2073-4395/9/7/408)
Supplement: s1 [file s1]

## Supplementary file

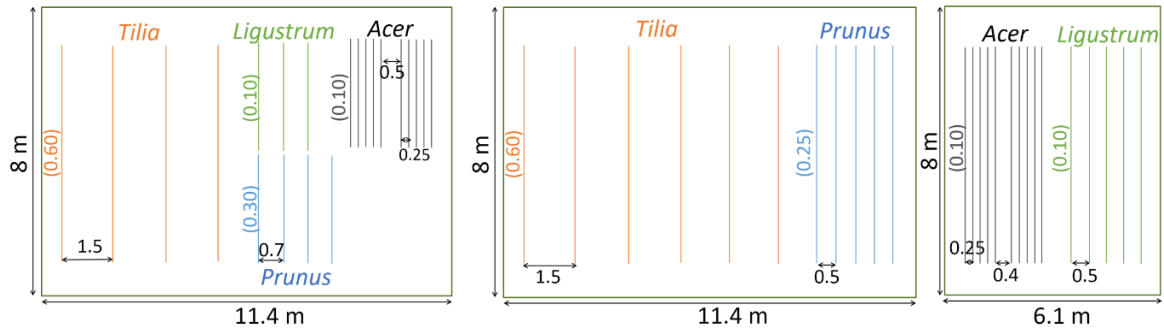

**Figure S1.** Dimensions of one experimental plot in 2016 (left) and in 2017 and 2018 (right). Between row distances (horizontal) and within row distances (vertical, in brackets) in meter.

**Table S1.** Corresponding dates for occurring Days of the Year (DOY) on graphs.

| Day Of the Year (DOY) | Date        |
|-----------------------|-------------|
| 100                   | April 10    |
| 150                   | May 30      |
| 200                   | July 19     |
| 250                   | September 7 |
| 300                   | October 27  |

**Table S2.** Fertilization dates in 2016–2018.

| Year | Date     | Day Of the Year (DOY) |
|------|----------|-----------------------|
| 2016 | May 31   | 152                   |
|      | July 7   | 187                   |
|      | August 8 | 218                   |
| 2017 | May 2    | 122                   |
|      | May 30   | 150                   |
|      | June 26  | 177                   |
|      | July 27  | 208                   |
| 2018 | April 13 | 103                   |
|      | May 2    | 122                   |
|      | May 25   | 145                   |
|      | June 15  | 166                   |

**Table S3.** Average precipitation (mm) and air temperature (°C) during the three growing seasons at the experimental site and 30-year average data from RMI Belgium, Ukkel (1981–2010).

|               | Precipitation (mm) |                   |                   |             | Air temperature (°C) |                   |                   |             |
|---------------|--------------------|-------------------|-------------------|-------------|----------------------|-------------------|-------------------|-------------|
|               | P <sub>2016</sub>  | P <sub>2017</sub> | P <sub>2018</sub> | P30-yr avg. | T <sub>2016</sub>    | T <sub>2017</sub> | T <sub>2018</sub> | T30-yr avg. |
| <b>March</b>  | 83.4               | 43                | 93.4              | 70          | 5.5                  | 9.1               | 5.0               | 6.8         |
| <b>April</b>  | 58.4               | 18.4              | 52.6              | 51.3        | 8.8                  | 8.8               | 12.5              | 9.8         |
| <b>May</b>    | 115.6              | 24.2              | 28.8              | 66.5        | 14.4                 | 15.6              | 16.2              | 13.6        |
| <b>June</b>   | 98                 | 22.4              | 25.2              | 71.8        | 16.8                 | 19.5              | 18.0              | 16.2        |
| <b>July</b>   | 27                 | 68.4              | 3.8               | 73.5        | 19.4                 | 18.8              | 21.8              | 18.4        |
| <b>August</b> | 44.2               | 71                | 69.8              | 79.3        | 18.9                 | 18.1              | 19.0              | 18          |

|           |      |      |      |      |      |      |      |      |
|-----------|------|------|------|------|------|------|------|------|
| September | 16   | 71.6 | 43.8 | 68.9 | 17.6 | 14   | 14.8 | 14.9 |
| October   | 53.4 | 41   | 30.8 | 74.5 | 10.1 | 13.4 | 12.2 | 11.1 |

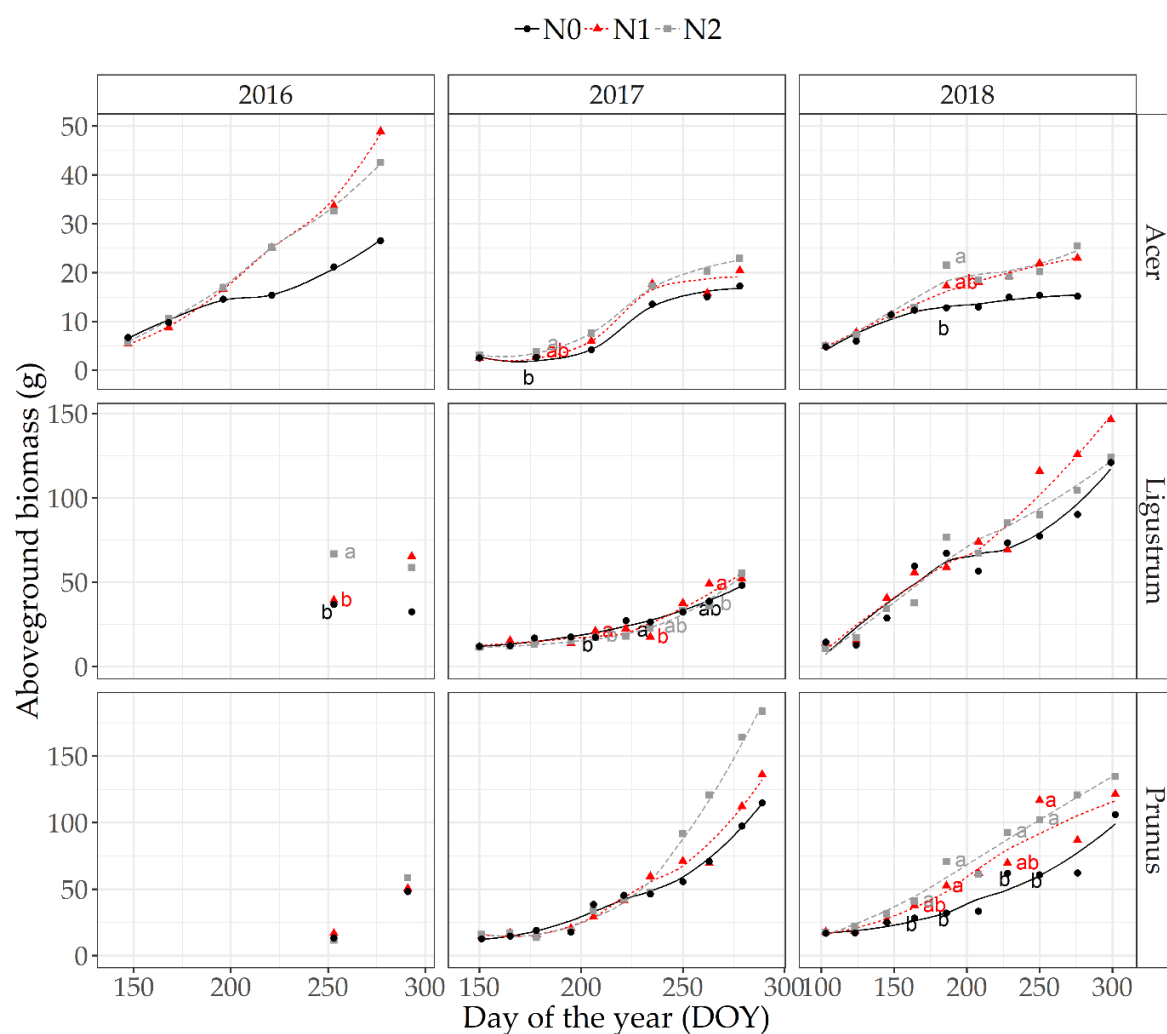

**Figure S2.** Biomass accumulation for *Acer*, *Ligustrum* and *Prunus* at each experimental year (2016–2018). N0: Deficiency treatment, N1: Standard treatment, N2: High N rate treatment. Each point is the mean of three replicates. Means labelled by different letters did significantly differ at  $P \leq 0.05$ . If no letters are present, no significant differences were present at that time point. In 2016, entire plants of *Ligustrum* and *Prunus* were only sampled twice. *Tilia* was not sampled regularly over the years.

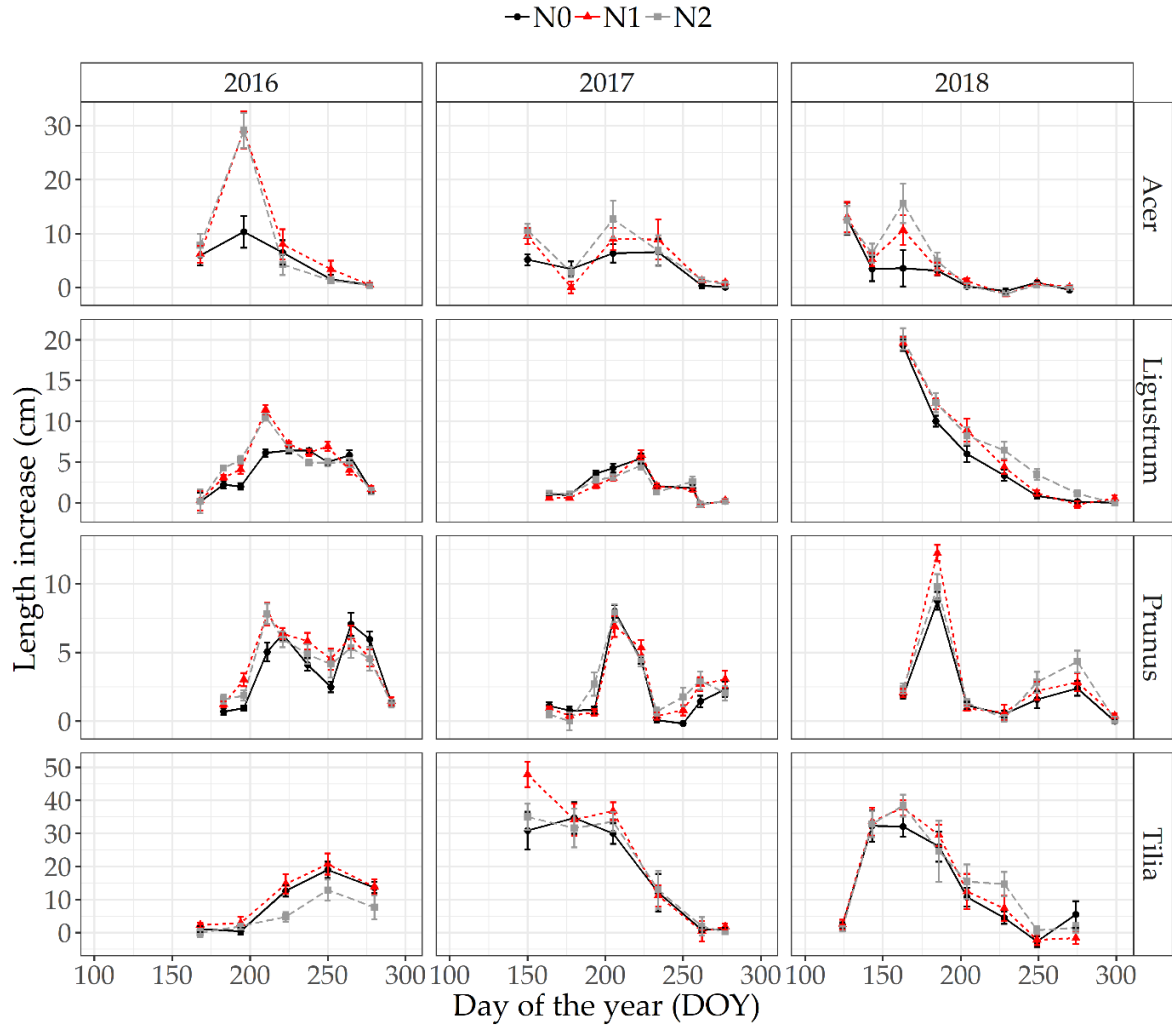

**Figure S3.** Length increase for *Acer*, *Ligustrum*, *Prunus* and *Tilia* at each experimental year (2016–2018). N0: deficiency treatment, N1: Standard treatment, N2: High N rate treatment. Every time point represents the difference in length between that and the previous measuring moment. Each point is the mean of three replicates. Error bars indicate standard errors.

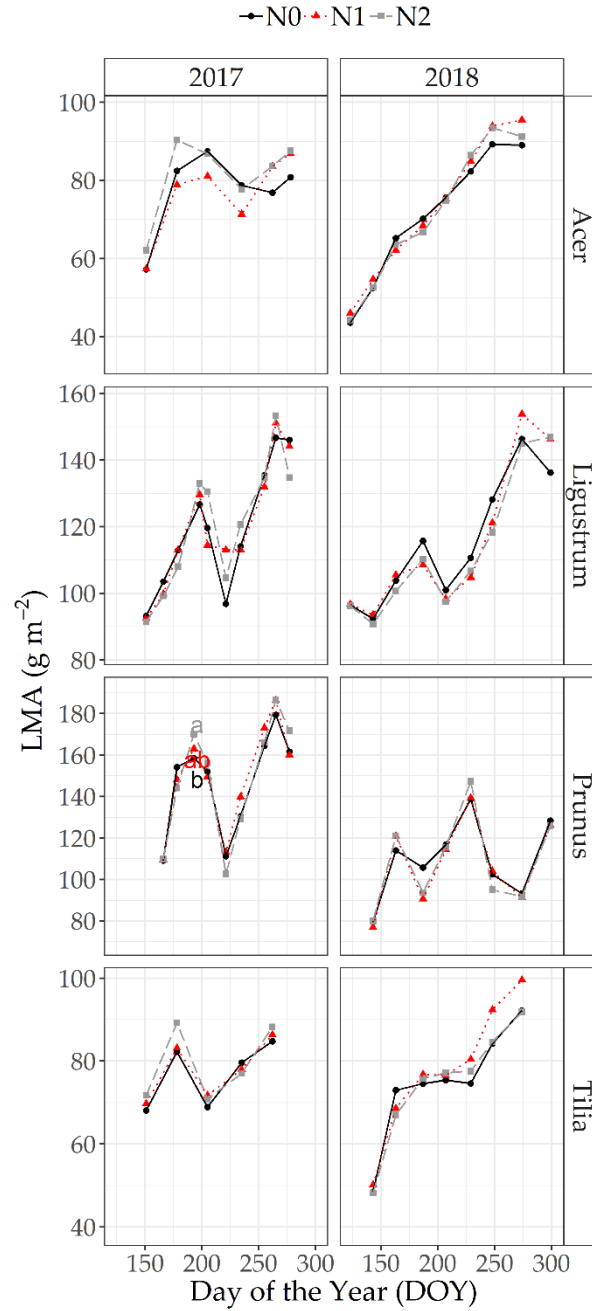

**Figure S4.** Changes in LMA of young leaves of *Acer*, *Ligustrum*, *Prunus* and *Tilia* in 2017–2018. N0: Deficiency treatment, N1: Standard treatment, N2: High N rate treatment. Each point is the mean of three replicates of 10 (2017) or 15 (2018) pooled leaves. Means labelled by the same letter did not significantly differ at  $P \leq 0.05$ . If no letters are present, no significant differences were present.
